# Supplementary material
Source: MDPI journal article supplement (https://www.mdpi.com/2073-4344/12/3/255)
Supplement: s1 [file s1]

Supplementary data.

# Pt-Mo/C, Pt-Fe/C, and Pt-Mo-Sn/C Nanocatalysts Derived from Cluster Compounds for Proton Exchange Membrane Fuel Cells

Sergey S. Shapovalov <sup>1,2</sup>, Natalia A. Mayorova <sup>3</sup>, Alexander D. Modestov <sup>3,\*</sup>, Andrei A. Shiryaev <sup>3</sup>,  
Alexander V. Egorov <sup>4</sup> and Vitali A. Grinberg <sup>3</sup>

<sup>1</sup> Kurnakov Institute of General and Inorganic Chemistry, Russian Academy of Sciences, Leninsky prospekt 31, 119991 Moscow, Russia; schss@yandex.ru

<sup>2</sup> National Research University Higher School of Economics, Vavilova Street 7, 117312 Moscow, Russia

<sup>3</sup> Frumkin Institute of Physical Chemistry and Electrochemistry, Russian Academy of Sciences, Leninsky prospekt 31, building 4, 119071 Moscow, Russia; maynat54@mail.ru (N.A.M.); a\_shiryaev@mail.ru (A.A.S.); vitgreen@mail.ru (V.A.G.)

<sup>4</sup> Lomonosov Moscow State University, Department of Chemistry Leninskie gory, 1 building 3, 119991 Moscow, Russia; egorov@kge.msu.ru

\* Correspondence: amodestov@mail.ru

MEA can be used for evaluation of the electrochemically active surface area (ECSA) of Pt in the catalyst layer by measurements of electrochemical adsorption/desorption of hydrogen. For that, working electrode compartment of the studied MEA containing PtMo/C catalyst (working electrode) was supplied with humidified nitrogen, while humidified hydrogen was supplied to the compartment of the counter electrode, containing Pt/C catalyst. Since overvoltage at the counter electrode (Pt/C) in the presence of hydrogen and protons is negligible, scanning of the cell voltage in the potential range 0.05-1.3 V, results in electrochemical adsorption and desorption of hydrogen on the PtMo/C catalyst and is accompanied by redox processes involving Mo species of different valence.

Cyclic voltammetry at room temperature under conditions described is shown in Figure S1. The curve obtained differs from the voltammetry of hydrogen adsorption/desorption on Pt by the presence of a pair of redox peaks (I) and (II). These peaks can be ascribed to redox processes of MoO<sub>x</sub>-type species.

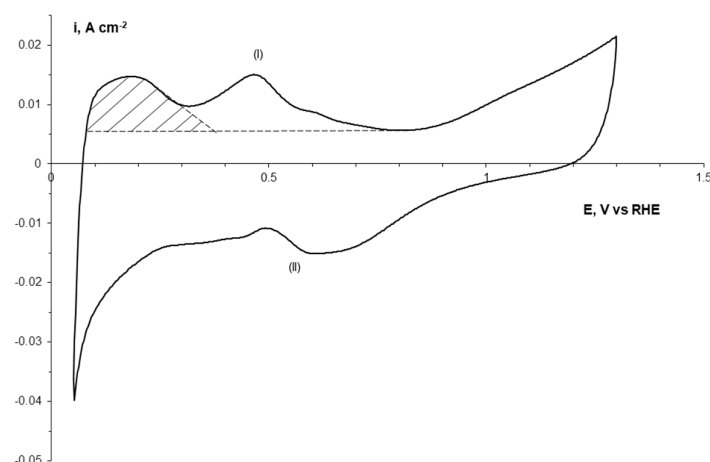

**Figure S1.** Cyclic voltammetry of hydrogen adsorption/desorption at PtMo/C catalyst measured at room temperature with MEA, containing PtMo/C at the working electrode. Voltage scan rate is 50 mV s<sup>-1</sup>.

Although the curve seems complicated due to the presence of these redox peaks, it can be used for rough estimation of the platinum ECSA in the PtMo/C catalyst. Using the charge in the dashed area (see Figure S1) and assuming adsorption of one hydrogen atom per single surface Pt atom [S1], the value of platinum ECSA ~66 m<sup>2</sup> g<sup>-1</sup><sub>Pt</sub> is obtained, which corresponds to evaluation of the Pt ECSA by TEM measurements.

**Table S1.** XRF Spectroscopy study of the as- prepared catalysts PtFe/C, PtMo/C and catalysts subjected to 50 cycles of voltammetry in a three electrode cell.

|                           |       |           |       |       |
|---------------------------|-------|-----------|-------|-------|
| Samples PtFe and PtMo     |       |           |       |       |
| Date 17/2/2022 3:50:05 PM |       |           |       |       |
| Result type               |       | Atomic[%] |       |       |
| Spectrum Label            | Calc  | Pos.X     | Pos.Y | Pos.Z |
| 15keV P4                  | YES   | -1566     | 23684 | 0     |
| All results in atomic[%]  |       |           |       |       |
| Sample                    | Pt    | Fe        | Mo    | Total |
| Pt-Fe as-prepared         | 48.89 | 51.11     |       | 100   |
| Pt-Mo as-prepared         | 39.89 |           | 60.11 | 100   |
| Pt-Fe after               | 52.90 | 47.10     |       | 100   |
| Pt-Mo after               | 50.9  |           | 49.1  | 100   |

The voltammetry measurements were performed at a scan rate of 0.05V s<sup>-1</sup> in the potential range 0 - 1.2 V vs RHE in argon purged 0.5M H<sub>2</sub>SO<sub>4</sub> at room temperature. The

thin layers of PtFe/C, PtMo/C catalyst were coated on the surface of a glassy carbon disk electrode.

#### References.

- S1. Conway, B.; Angerstein-Kozłowska A.; Sharp W.B.A. Temperature and pressure effects on surface processes at noble metal electrodes. Part 1.—Entropy of chemisorption of H at Pt surfaces. *J. Chem. Soc. Faraday Trans.* **1978**, *1*, 1373-1389. <https://doi.org/10.1039/F19787401373>.
